# Supplementary material
Source: publisher figshare collection journal article supplement (https://asha.figshare.com/articles/dataset/_/24562732)
Supplement: Supplementary file 1 [file 2]

## Supplemental Material S1. Search terms scoping review.

### Three topic areas:

1. Paediatrics
2. Feeding Behaviours
3. Food Allergies

|                           |                                                                                                                                                                                                                                                                                                                                                                                                                                                                                                                                                                                                                                                                          |
|---------------------------|--------------------------------------------------------------------------------------------------------------------------------------------------------------------------------------------------------------------------------------------------------------------------------------------------------------------------------------------------------------------------------------------------------------------------------------------------------------------------------------------------------------------------------------------------------------------------------------------------------------------------------------------------------------------------|
| <b>Paediatrics</b>        | <p>Pediatric<br/> Paediatric [all fields] and [MeSH] and all the spellings of paed<br/> Child [MeSH]<br/> Children for PubMed because Child MeSH is included<br/> Infants [MeSH and all fields]<br/> Infant newborn [MeSH]<br/> Baby [All fields]<br/> Babies [All fields]</p>                                                                                                                                                                                                                                                                                                                                                                                           |
| <b>Feeding Behaviours</b> | <p>Feeding and eating disorders [All fields - includes MeSH term] –<br/> Deglutition disorders [All Fields – includes MeSH term]<br/> Deglutition [All fields – includes MeSH term]<br/> Feeding behavior [All Fields – includes MeSH term and spellings]<br/> “Feeding behaviors” [All Fields]<br/> “Feeding behaviours” [All Fields]<br/> Child nutrition disorder [All Fields includes MeSH term]<br/> Mouth [MeSH]<br/> Food fussiness [All Fields – includes MeSH term]<br/> Feeding and eating disorders of childhood [All Fields includes MeSH term]<br/> Avoidant Restrictive Food Intake Disorder [All Fields includes MeSH term]<br/> ARFID<br/> Dysphagia</p> |

|                       |                                                                                                                                                                                                                                                                                                                                                                                                                                                                                                                                                                                                                                                                                                                                                                                    |
|-----------------------|------------------------------------------------------------------------------------------------------------------------------------------------------------------------------------------------------------------------------------------------------------------------------------------------------------------------------------------------------------------------------------------------------------------------------------------------------------------------------------------------------------------------------------------------------------------------------------------------------------------------------------------------------------------------------------------------------------------------------------------------------------------------------------|
|                       | <p>"Paediatric dysphagia"</p> <p>"Pediatric dysphagia"</p> <p>"Maladaptive feeding behavior*"</p> <p>"Eating behavior*" - maps to Feeding Behaviour without quotes</p> <p>"Eating behaviour*"</p> <p>"Mealtime behaviour*"</p> <p>"Mealtime behavior*"</p> <p>"Behavioural feeding"</p> <p>"Behavioral feeding"</p> <p>"Swallowing disorder*"</p> <p>"Paediatric feeding disorder*"</p> <p>"Pediatric feeding disorder*"</p> <p>"Infant feeding"</p> <p>"Picky eating"</p> <p>"Restricted diet" (Diet restriction in EMBASE)</p> <p>"Food refusal"</p> <p>"Oral motor"</p> <p>"Impaired oral intake"</p> <p>"Oral praxis"</p> <p>Oromotor</p> <p>"Oral sensory"</p> <p>"Oral hypersensitivity"</p> <p>Chewing [All Fields – includes MeSH term for Mastication]</p> <p>"Chew*"</p> |
| <b>Food Allergies</b> | <p>Food hypersensitivity [All fields – includes MeSH term]</p> <p>Hypersensitivity [All fields – includes MeSH term]</p> <p>Allergy and immunology [All fields – includes MeSH term] Separate in EMBASE</p> <p>Anaphyla*</p> <p>Food Intolerance* [All fields – includes MeSH term]</p>                                                                                                                                                                                                                                                                                                                                                                                                                                                                                            |

|  |                                                                                                                                                                                                                                                                                                                                                                                                                                                                                                                                                                                                                                                                                                                                                                                                                                                                                               |
|--|-----------------------------------------------------------------------------------------------------------------------------------------------------------------------------------------------------------------------------------------------------------------------------------------------------------------------------------------------------------------------------------------------------------------------------------------------------------------------------------------------------------------------------------------------------------------------------------------------------------------------------------------------------------------------------------------------------------------------------------------------------------------------------------------------------------------------------------------------------------------------------------------------|
|  | <p>"Food allerg*"</p> <p>Atop*</p> <p>Atopic disease*</p> <p>Peanut hypersensitivity [All fields – includes MeSH term]</p> <p>Peanut allerg*</p> <p>Nut hypersensitivity [All fields – includes MeSH term]</p> <p>Nut allerg*</p> <p>Egg hypersensitivity [All fields – includes MeSH]</p> <p>Egg allerg*</p> <p>Wheat hypersensitivity [All fields – includes MeSH]</p> <p>Wheat allerg*</p> <p>Milk hypersensitivity [All fields – includes MeSH]</p> <p>Milk Allerg*</p> <p>Gluten hypersensitivity [All fields – includes "glutens" MeSH term]</p> <p>"Gluten hypersensitivity"</p> <p>"Gluten allerg*"</p> <p>"Seafood hypersensitivity"</p> <p>"Seafood allerg*"</p> <p>"Fish hypersensitivity"</p> <p>"Fish allerg*"</p> <p>"Crustacea hypersensitivity" No results Pubmed</p> <p>"Crustacea allerg*"</p> <p>"Soybean hypersensitivity" No results Pubmed</p> <p>"soybean allerg*"</p> |
|--|-----------------------------------------------------------------------------------------------------------------------------------------------------------------------------------------------------------------------------------------------------------------------------------------------------------------------------------------------------------------------------------------------------------------------------------------------------------------------------------------------------------------------------------------------------------------------------------------------------------------------------------------------------------------------------------------------------------------------------------------------------------------------------------------------------------------------------------------------------------------------------------------------|
