# Supplementary material
Source: publisher figshare collection journal article supplement (https://asha.figshare.com/articles/dataset/_/24562732)
Supplement: Supplementary file 1 [file 2]

## Sheet: Demographics
Supplemental material, Kefford et al., “Feeding Characteristics in Children With Food Allergies: A Scoping Review,” JSLHR, https://doi.org/10.1044/2023_JSLHR-23-00303
Study ID	Article	Date	Country of Origin	Disciplines Involved in Authorship	Setting	Primary Search	From Citations
1
2
3
4
5
6

## Sheet: Methodology & Set up
Supplemental material, Kefford et al., “Feeding Characteristics in Children With Food Allergies: A Scoping Review,” JSLHR, https://doi.org/10.1044/2023_JSLHR-23-00303
Study ID	Study Aims	Type of Study	Population	Minimum Age	Maximum Age	Average Age	Atopic Family Reported	No of Participants	%male	%female	Control/Comparison Group	Inclusion Criteria	Exclusion Criteria	Ax Criteria	Allergy Tests Used								Ax Tool	Validated tool	Self Developed Ax Tool	?Medical Dx: EOE/FPIES/Anorexia/Bulimia						Developmental Dx		Feeding Dx - as reported by the article
		Retro/prospective/Case Study/ Popn Study etc					Y/N and any %				Y/N			For any assessment criterias - ie only parent report, levels of EOE for Dx, if no formal Ax tools used - how did they assess the outcomes for their Ax	SPT	Ige Blood Test (RAST)	Oral Food Challenge	Clinical History	Atopty Test Patch (non IgE)	Immuno Solid-phase Allergen Chip	Reported Anapylaxis	Endoscopy	Formal Ax tools reported on for their data	Y/N	Y/N	EOE	FPIES	Anorexia/Bulimia	Short Bowel Syndrome	GORD	Genetic anomaly	ASD	GDD	ARFID	Feeding Difficulties	Supplemental Feeding	PFD	Picky eating	Food aversion	Refusal to swallow	Poor oral intake	Food avoidance due to AFR	Food Neophobia	Feeding dysfunction	Oral Aversion	Parent Reported
1
2
3
4
5
6

## Sheet: Results
Supplemental material, Kefford et al., “Feeding Characteristics in Children With Food Allergies: A Scoping Review,” JSLHR, https://doi.org/10.1044/2023_JSLHR-23-00303
Study ID	Food Allergens recorded within the paper																								Prevelance Fig for FA - if recorded	IgE Reported	Non-IgE Reported	EOE, EGID Reported	Diagnostic Criteria for PFD as per Goday et al (2019)								Correlation Between PFD and FA in discussion/paper	FA just reported in a table in results.	Evidence of correlation?	General Comments
	Cow's Milk	Egg	Soy	Wheat	Seafood	Peanut	Tree Nuts	Beef	Lentils	Chicken	Shrimp	Oat	Corn	Rice	Barley	Peas	Rockmelon	Kiwi	Apple	Sesame	Banana	Potato	Mushroom	Walnuts	What figure did they report for the prevalence of allergic disease/s	Y/N	Y/N	Y/N	Medical dysfunction	Sypmtoms of Med Dys	Feeding skill dysfunction	Symptoms of Feeding skill Dysfunction ?textural mod etc utensils etc efficiency and modifications needed.	Nutritional dysfunction	Symptoms of Nutritional Dys	Psychosocial dysfunction	Symptoms of Psychosocial Dys	Y/N	Y/N	?more detail re what they found? Moderate/strong - what tools they used to find correlation.
1
2
3
4
5
6

## Sheet: Articles from Ref Lists
Supplemental material, Kefford et al., “Feeding Characteristics in Children With Food Allergies: A Scoping Review,” JSLHR, https://doi.org/10.1044/2023_JSLHR-23-00303
References
From Maslin et al (2015)
	Wright, Parkinson, Shipton, Drewett (2007) How do toddler eating problems realted to their eating behjaviour food preferences and growth. No mention of FA
	Burklow, McGrath, Valerius, Rudolph, Relationship between feeding difficulties, medical complexity and gestational age (2002) No mention of FA
	Davis, Bruce, Khasawneh, Shultz, Fox, Dunn (2013) Sensory processing issues in young children presenting to an outpatient feeding clinic: A retrospective chart review. No mention of FA
	Northstone, K., Emmet, P, Nethersole F. The effet of age introduction to lumpy solids on foods eaten and reported feeding difficulties (2001) No mention of feeding beh about weaning. Allergy mentioned in a table only - but only as a classification not as a variable if that makes sense.
	Levine A Bachar L, Tsangen Z et al. Screening criteria for dx of infantile feeding disorders as a cause or poor feeding or food refusal (2011) FA mentioned in passing re 5 infants in the control group - but not linked back to their Dx of PFD. And their investigating three ways of classifying dx PFD which makes it hard as the FA are mentioned in passing as different methods of Dx would have placed…
From Newton et al 2011	Haas and Maune 2009 (downloaded)			R/V article.
From Patrawala	sys r/v and meta analysis of PFD mx. Downloaded
From polloni	noimark and cox 2008 downloaded Excluded no mention of feeding Beh										DunnGalvin, A Gaffney A (2009) Developmental pathways in FA (Downloaded) Included
From Rodregues 2021	Ercan 2021 - downloaded Included
From Ercan 2021	Meyer, Rommel 2014 (got already from endnote lib) Included					Carruth and Skinner 2002 Feeding behaviours and other motor development in healthy children. No mention of FA
From Meyer etc all	32 Meyer Dziubak et al 2013
From Meyer 2014	Wright 2006 no mention of FA
	meyer fleming michaelia chakravati 2010 aversive feeding beh in children with FA affecting ……Abstract only??? Maybe a conference?? Article ordered through UQ Lib
